# Supplementary material for: Weight transitions and psychosocial factors: A longitudinal cohort study of Finnish primary school children with overweight
Source: PubMed Central journal article supplement — Prev Med Rep. 2020 Nov 5;20:101239. doi: 10.1016/j.pmedr.2020.101239 (PMC7710645; doi:10.1016/j.pmedr.2020.101239), 2020-11-05
Supplement: mmc2.pdf [file mmc2.pdf]

## SUPPLEMENTARY MATERIAL

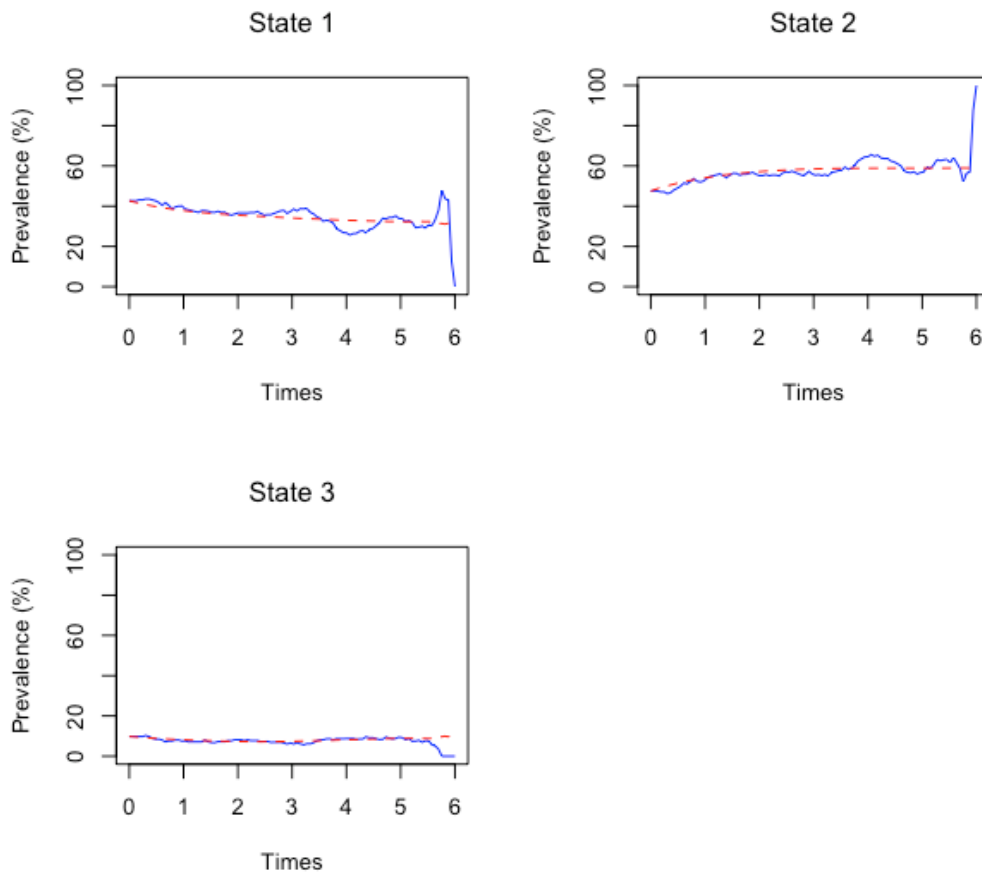

**Figure S1** The final model for girls: expected (red dotted line) and observed (blue line) prevalence of each state (1- Normal weight, 2 – overweight, 3 – obesity) plotted along follow-up time (years)

225 sixth grader girls in 2013 in Helsinki, Finland

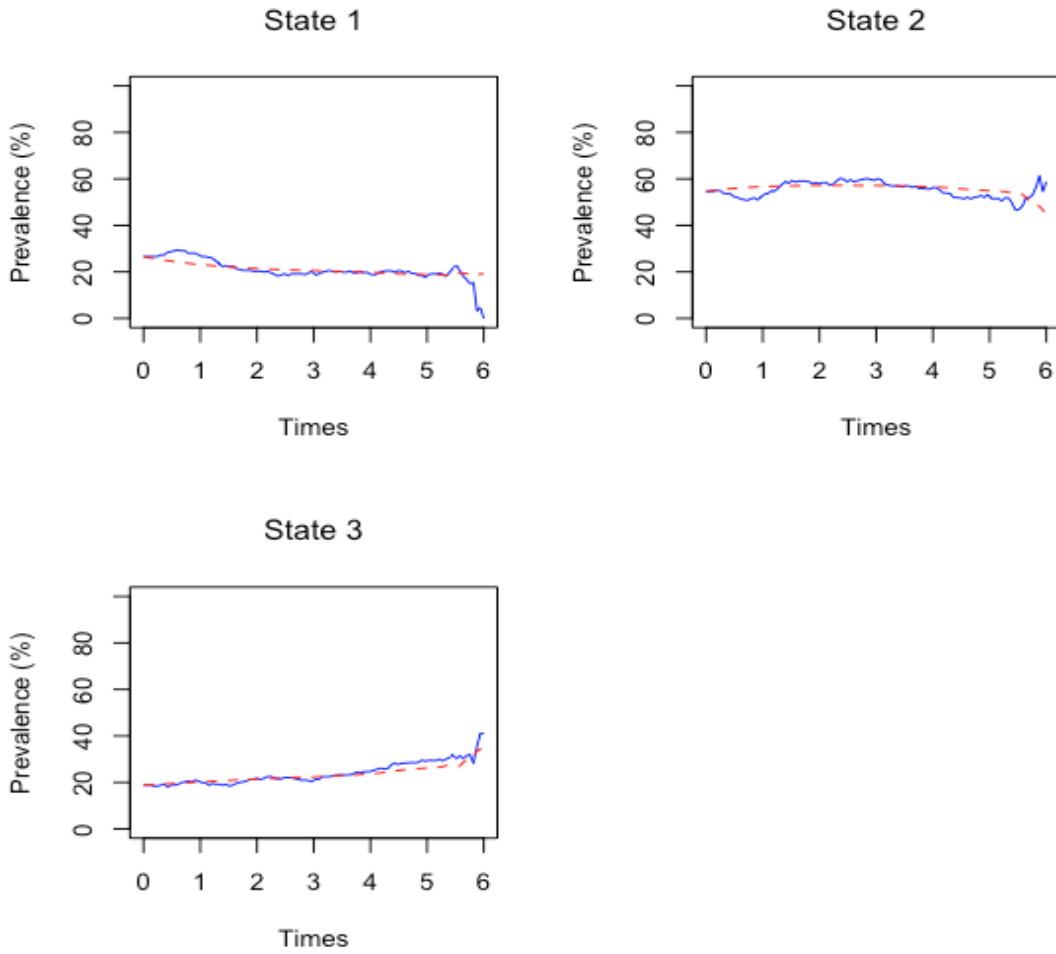

**Figure S2** The final model for boys: expected (red dotted line) and observed (blue line) prevalence of each state (1- Normal weight, 2 – overweight, 3 – obesity) plotted along follow-up time (years)

282 sixth grader boys in 2013 in Helsinki, Finland
