# Supplementary material for: Weight transitions and psychosocial factors: A longitudinal cohort study of Finnish primary school children with overweight
Source: PubMed Central journal article supplement — Prev Med Rep. 2020 Nov 5;20:101239. doi: 10.1016/j.pmedr.2020.101239 (PMC7710645; doi:10.1016/j.pmedr.2020.101239), 2020-11-05
Supplement: mmc3.pdf [file mmc3.pdf]

SUPPLEMENTARY MATERIAL

**Table S1** AIC values of the multistate intensity models fitted separately for girls and boys

| Model                    | Girls    |                     | Boys     |                     |
|--------------------------|----------|---------------------|----------|---------------------|
|                          | AIC      | p-value             | AIC      | p-value             |
| Null model               | 1636.095 |                     | 2040.994 |                     |
| Age                      | 1634.395 | 0.0458 <sup>n</sup> | 2041.689 | 0.1206 <sup>n</sup> |
| Pubertal development     | 1644.021 | 0.2775 <sup>a</sup> | 2047.847 | 0.2764 <sup>a</sup> |
| Family structure         | 1633.497 | 0.0637 <sup>a</sup> | 2038.961 | 0.0298 <sup>a</sup> |
| Parents' native language | 1631.877 | 0.0326 <sup>a</sup> | 2047.314 | 0.6672 <sup>a</sup> |
| Crises                   | 1639.364 | 0.6592 <sup>a</sup> | 2036.761 | 0.0116 <sup>a</sup> |
| Being bullied            | 1638.967 | 0.5891 <sup>a</sup> | 2035.983 | 0.0083 <sup>a</sup> |
| Special study needs      | 1635.951 | 0.6077 <sup>a</sup> | 2039.197 | 0.0329 <sup>a</sup> |

507 sixth graders (225 girls, 282 boys) in 2013 in Helsinki, Finland

p-values from the likelihood ratio test comparing nested models

<sup>n</sup> compared to the null model

<sup>a</sup> compared to the model including age
