# Supplementary material for: Weight transitions and psychosocial factors: A longitudinal cohort study of Finnish primary school children with overweight
Source: PubMed Central journal article supplement — Prev Med Rep. 2020 Nov 5;20:101239. doi: 10.1016/j.pmedr.2020.101239 (PMC7710645; doi:10.1016/j.pmedr.2020.101239), 2020-11-05
Supplement: mmc4.pdf [file mmc4.pdf]

SUPPLEMENTARY MATERIAL

**Table S2** Construction of the final multistate intensity models as based on AIC and p-values from the likelihood ratio test comparing nested models

| Girls                      |          |         | Boys                     |          |         |
|----------------------------|----------|---------|--------------------------|----------|---------|
| Model                      | AIC      | p-value | Constructing final model | AIC      | p-value |
| Age                        | 1634.395 |         | Age                      | 2041.689 |         |
| + Parents' native language | 1631.877 | 0.0326  | + Being bullied          | 2035.983 | 0.0083  |
| + Family structure         | 1631.156 | 0.0684  | + Crises                 | 2032.240 | 0.0194  |
|                            |          |         | + Family structure       | 2025.997 | 0.0066  |
|                            |          |         | + Special study needs    | 2025.986 | 0.0912  |

507 sixth graders (225 girls, 282 boys) in 2013 in Helsinki, Finland
