# Supplementary material for: Weight transitions and psychosocial factors: A longitudinal cohort study of Finnish primary school children with overweight
Source: PubMed Central journal article supplement — Prev Med Rep. 2020 Nov 5;20:101239. doi: 10.1016/j.pmedr.2020.101239 (PMC7710645; doi:10.1016/j.pmedr.2020.101239), 2020-11-05
Supplement: mmc5.pdf [file mmc5.pdf]

SUPPLEMENTARY MATERIAL

**Table S3** Overall number of consecutively observed BMI SDS categories between the ages of 6 and 14 years for 507 (225 girls and 282 boys) children being at sixth grade in 2013 in Helsinki, Finland affected by overweight during six primary school years

| BMI SDS category | BMI SDS category at next measurement |            |         |               |            |         |
|------------------|--------------------------------------|------------|---------|---------------|------------|---------|
|                  | Girls                                |            |         | Boys          |            |         |
|                  | Normal weight                        | Overweight | Obesity | Normal weight | Overweight | Obesity |
| Normal weight    | 292                                  | 151        | 0       | 194           | 127        | 1       |
| Overweight       | 126                                  | 652        | 29      | 104           | 715        | 85      |
| Obesity          | 0                                    | 30         | 120     | 0             | 66         | 424     |
